# Supplementary material for: Four-membered red iridium(iii) complexes with Ir–S–C–S structures for efficient organic light-emitting diodes
Source: Royal Society of Chemistry journal article supplement (doi:10.1039/d0tc01312a), 2020-01-01
Supplement: d0tc01312a1.pdf [file d0tc01312a1.pdf]

## Supporting Information (SI)

### Four-membered red iridium(III) complexes with Ir-S-C-S structures for efficient organic light-emitting diodes

Ning Su,<sup>a,b</sup> Fang-Ling Li,<sup>a</sup> You-Xuan Zheng<sup>a\*</sup>

*a State Key Laboratory of Coordination Chemistry, Jiangsu Key Laboratory of Advanced Organic Materials, School of Chemistry and Chemical Engineering, Nanjing University, Nanjing 210093, P. R. China.*

*E-mail: yxzheng@nju.edu.cn*

*b College of Physics and Optoelectronic Engineering, Shenzhen University, Shenzhen 518060, China.*

*E-mail: suning@szu.edu.cn*

#### Materials and Measurements.

All reagents and chemicals were purchased from commercial sources and used without further purification. <sup>1</sup>H NMR and <sup>19</sup>F NMR were measured on a Bruker AM 400 spectrometer. High-resolution electrospray mass spectra (HRMS) was measured on G6500 from Agilent for complexes. TGA measurements were carried out on a DSC 823e analyzer (METTLER). Absorption and photoluminescence spectra were measured on a UV-3100 spectrophotometer and a Hitachi F-4600 photoluminescence spectrophotometer, respectively. The decay lifetimes were measured with an Edinburgh Instruments FLS-980 fluorescence spectrometer in degassed CH<sub>2</sub>Cl<sub>2</sub> solution at room temperature. The luminescence quantum efficiencies were calculated by comparison of the emission intensities (integrated areas) of a standard sample (*fac*-Ir(ppy)<sub>3</sub>) and the unknown sample.

#### X-ray Crystallography.

The single crystals of complexes were carried out on a Bruker SMART CCD diffractometer using monochromated Mo K $\alpha$  radiation ( $\lambda = 0.71073 \text{ \AA}$ ) at room temperature. Cell parameters were retrieved using SMART software and refined using SAINT<sup>1</sup> on all observed reflections.

Data were collected using a narrow-frame method with scan widths of  $0.30^\circ$  in  $\omega$  and an exposure time of 10 s/frame. The highly redundant data sets were reduced using SAINT and corrected for Lorentz and polarization effects. Absorption corrections were applied using SADABS<sup>2</sup> supplied by Bruker. The structures were solved by direct methods and refined by full-matrix least-squares on  $F^2$ .<sup>3</sup> The positions of metal atoms and their first coordination spheres were located from direct-methods E-maps; other non-hydrogen atoms were found in alternating difference Fourier syntheses and least-squares refinement cycles and, during the final cycles, refined anisotropically. Hydrogen atoms were placed in calculated position and refined as riding atoms with a uniform value of Uiso.

#### **Details of cyclic voltammetry measurements.**

Cyclic voltammetry measurements were conducted on a MPI-A multifunctional electrochemical and chemiluminescent system (Xi'an Remex Analytical Instrument Ltd. Co., China) at room temperature, with a polished Pt plate as the working electrode, platinum thread as the counter electrode and Ag-AgNO<sub>3</sub> (0.1 M) in CH<sub>2</sub>Cl<sub>2</sub> as the reference electrode, *tetra*-n-butylammonium perchlorate (0.1 M) was used as the supporting electrolyte, using Fc<sup>+</sup>/Fc as the internal standard, the scan rate was 0.1 V s<sup>-1</sup>.

#### **OLEDs fabrication and measurement.**

All OLEDs were fabricated on the pre-patterned ITO-coated glass substrate with a sheet resistance of 15  $\Omega$  sq<sup>-1</sup>. The deposition rate for organic compounds is 1-2  $\text{\AA}$  s<sup>-1</sup>. The phosphor and the host (TCTA/ 2,6DCzPPy) was co-evaporated to form emitting layer from two separate sources. The cathode consisting of LiF/ Al was deposited by evaporation of LiF with a deposition rate of 0.1  $\text{\AA}$  s<sup>-1</sup> and then by evaporation of Al metal with a rate of 3  $\text{\AA}$  s<sup>-1</sup>. The characteristic curves of the devices were measured with a computer which controlled KEITHLEY 2400 source meter with a calibrated silicon diode in air without device encapsulation. On the basis of the uncorrected PL and EL spectra, the Commission Internationale de l'Eclairage (CIE) coordinates were calculated using a test program of the Spectra scan PR650 spectrophotometer.

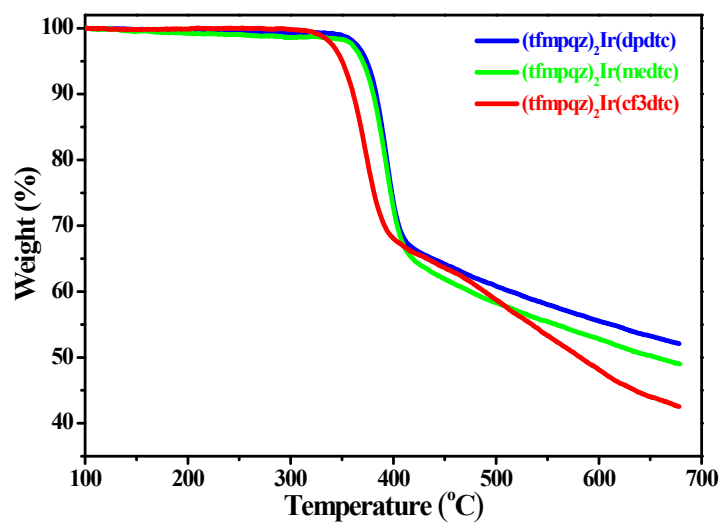

Fig. S1 TGA curves of (tfmpqz)<sub>2</sub>Ir(dpdtc), (tfmpqz)<sub>2</sub>Ir(medtc) and (tfmpqz)<sub>2</sub>Ir(cf3dtc) complexes.

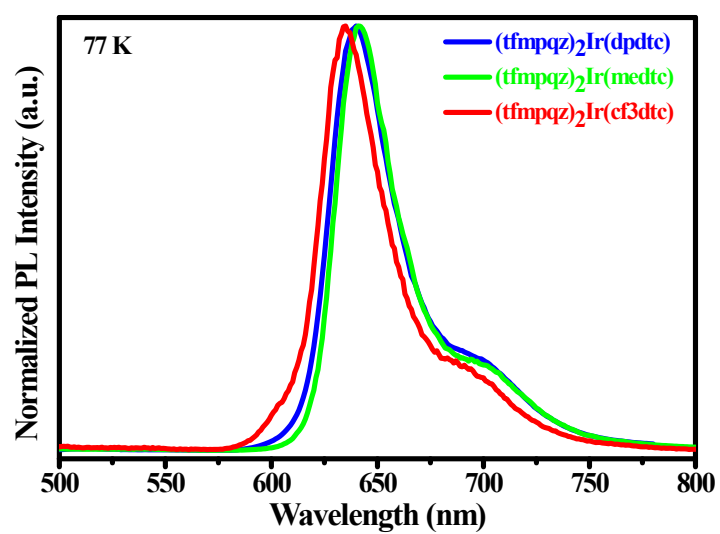

Fig. S2 The 77 K phosphorescent spectra of (tfmpqz)<sub>2</sub>Ir(dpdtc), (tfmpqz)<sub>2</sub>Ir(medtc) and (tfmpqz)<sub>2</sub>Ir(cf3dtc) complexes.

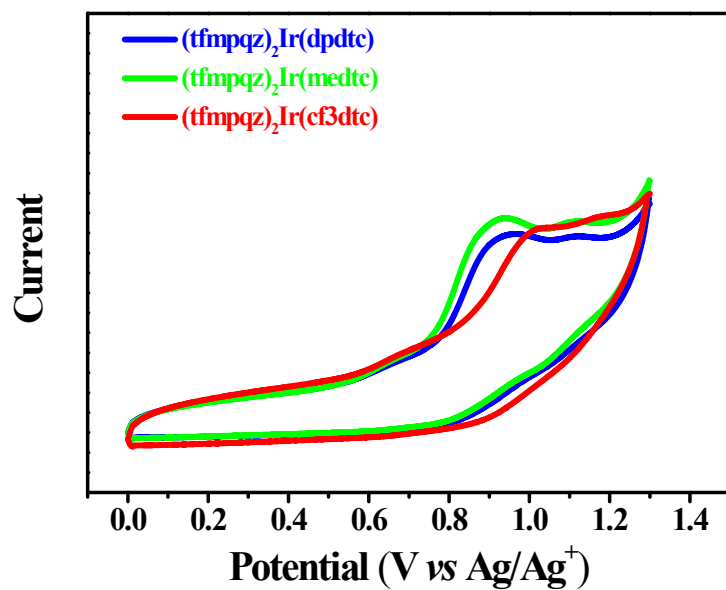

Fig. S3 CV curves of (tfmpqz)<sub>2</sub>Ir(dpdtc), (tfmpqz)<sub>2</sub>Ir(medtc) and (tfmpqz)<sub>2</sub>Ir(cf3dtc) complexes.

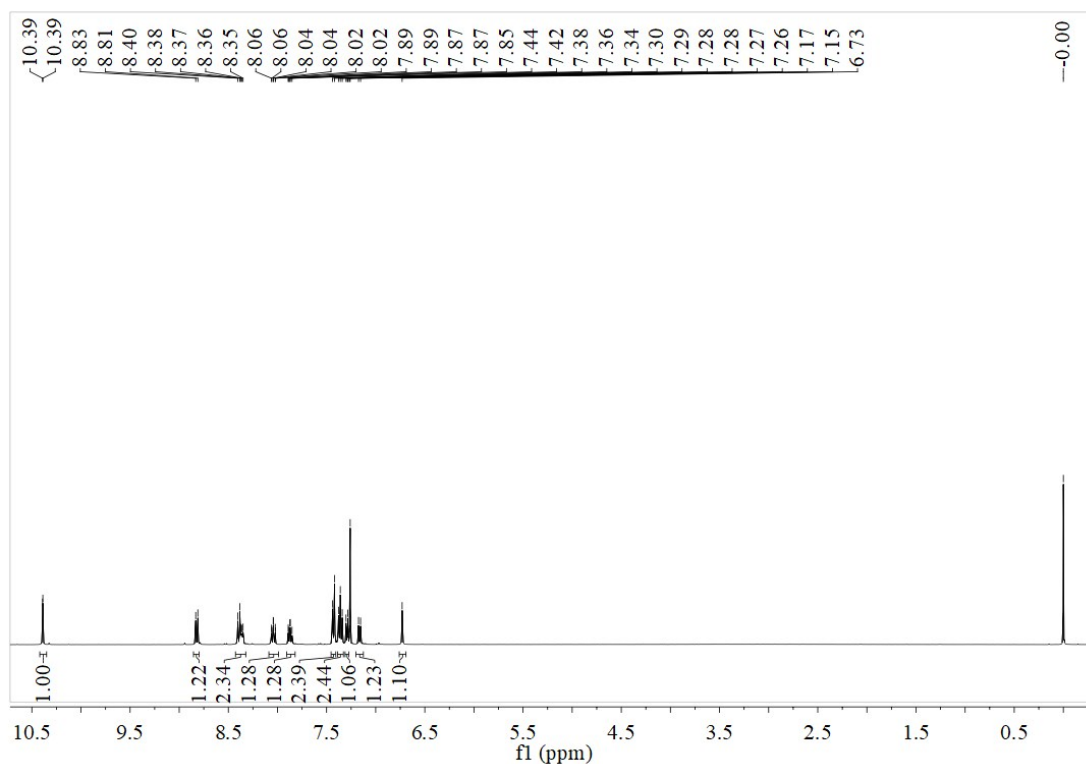

Fig. S4 <sup>1</sup>H NMR spectrum of (tfmpqz)<sub>2</sub>Ir(dpdtc) complex.

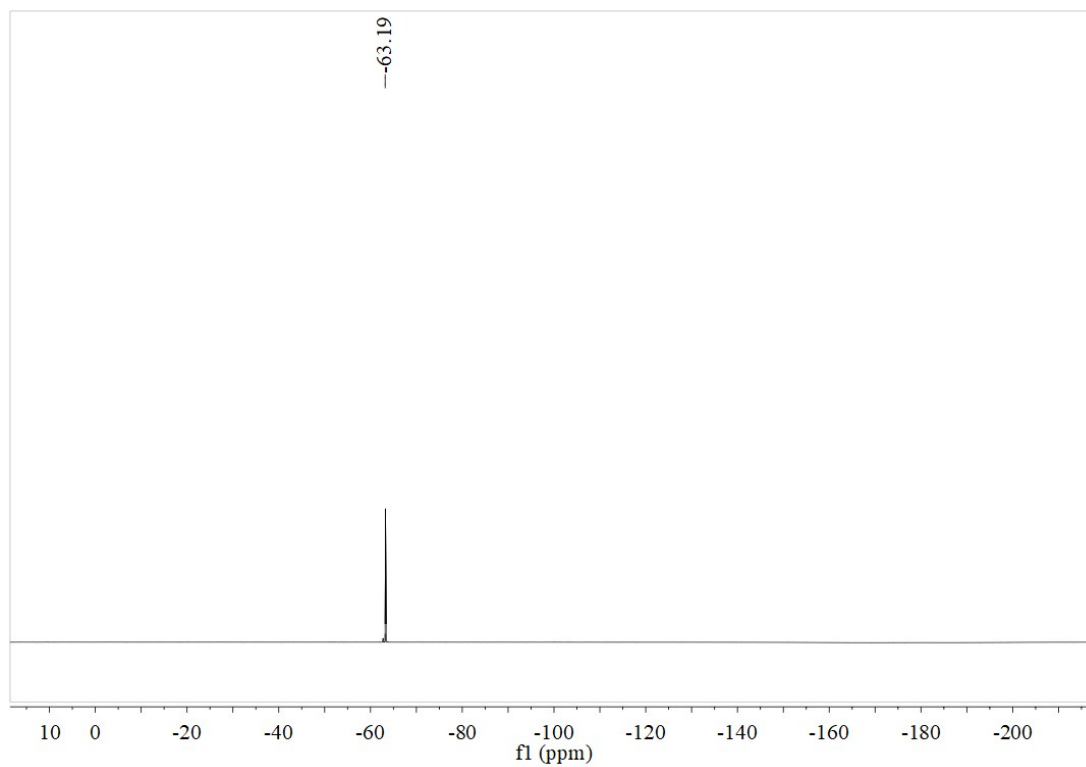

**Fig. S5**  $^{19}\text{F}$  NMR spectrum of  $(\text{tfmpqz})_2\text{Ir}(\text{dpdc})$  complex.

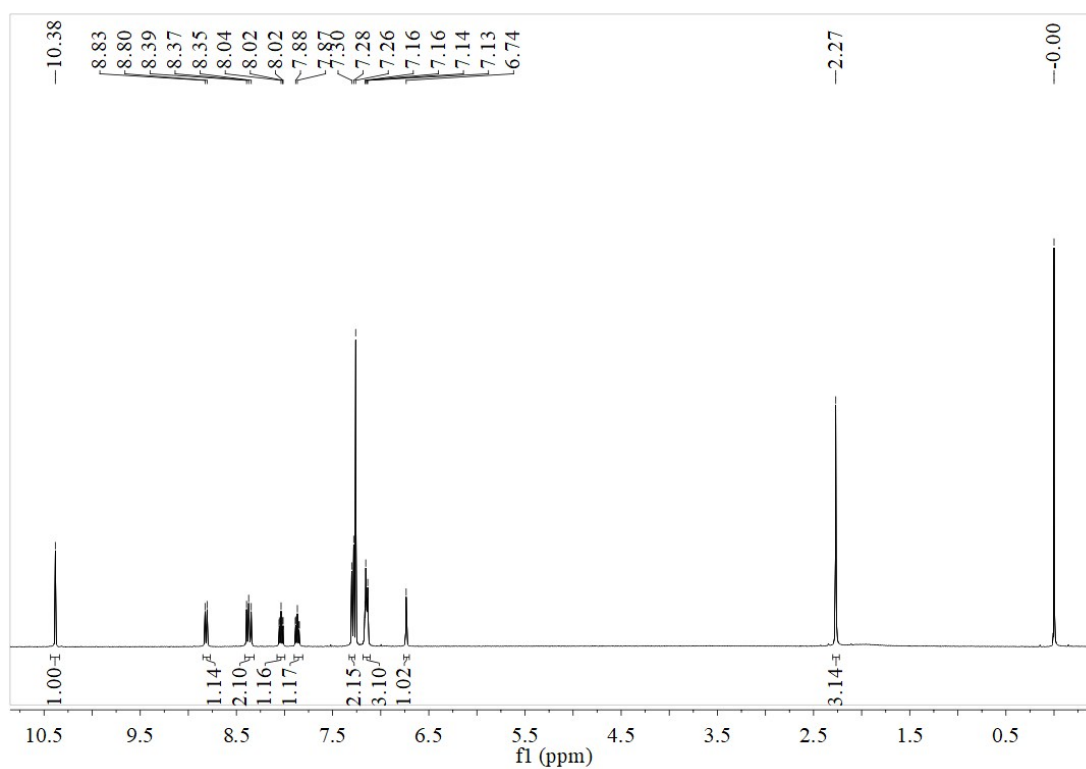

**Fig. S6**  $^1\text{H}$  NMR spectrum of  $(\text{tfmpqz})_2\text{Ir}(\text{medtc})$  complex.

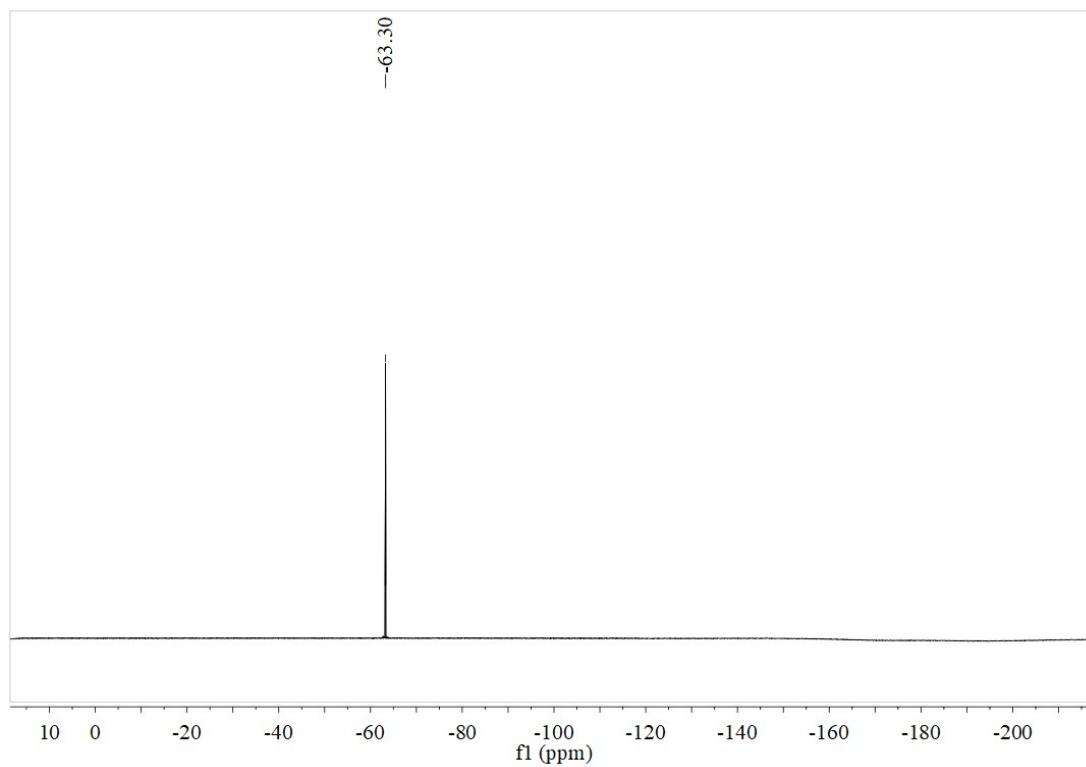

**Fig. S7**  $^{19}\text{F}$  NMR spectrum of  $(\text{tfmpqz})_2\text{Ir}(\text{medtc})$  complex.

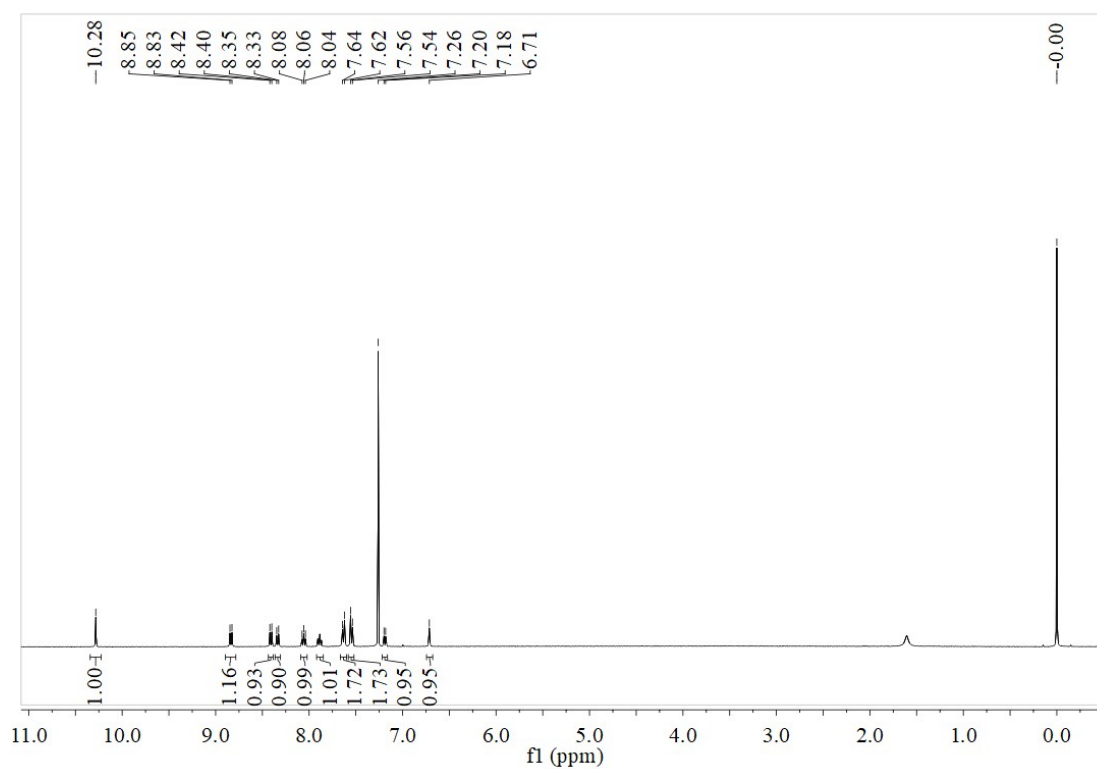

**Fig. S8**  $^1\text{H}$  NMR spectrum of  $(\text{tfmpqz})_2\text{Ir}(\text{cf}_3\text{dtc})$  complex.

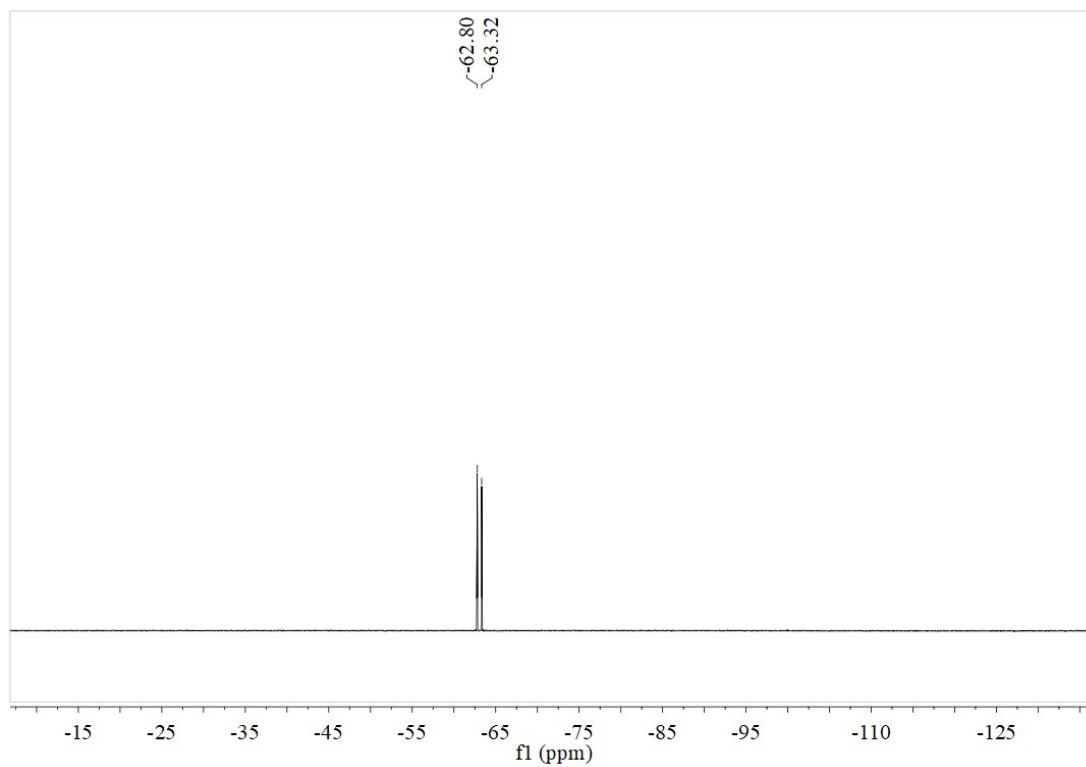

**Fig. S9**  $^{19}\text{F}$  NMR spectrum of  $(\text{tfmpqz})_2\text{Ir}(\text{cf}_3\text{dtc})$  complex.

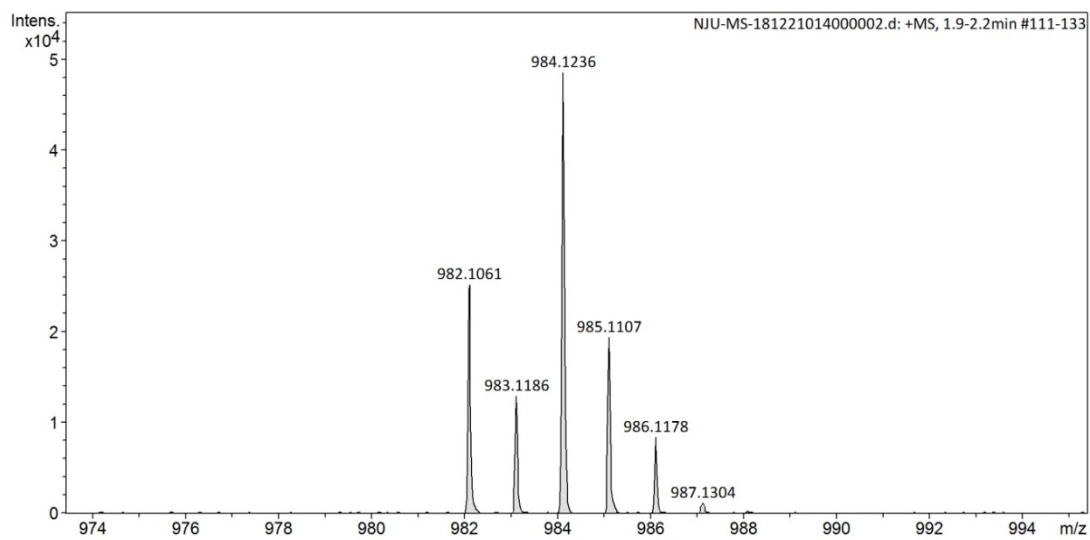

**Fig. S10** HRMS spectrum of  $(\text{tfmpqz})_2\text{Ir}(\text{dpdtc})$  complex.

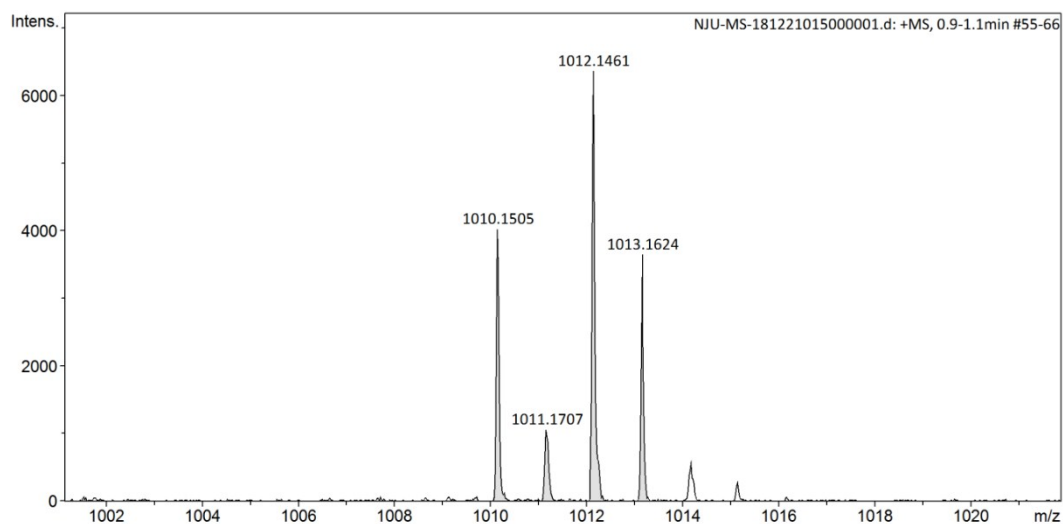

**Fig. S11** HRMS spectrum of (tfmpqz)<sub>2</sub>Ir(medtc) complex.

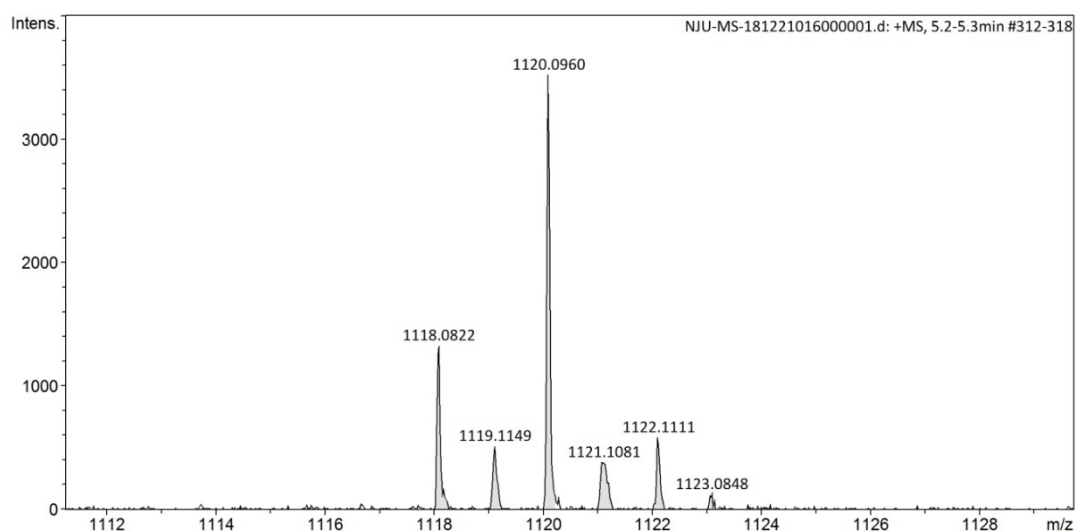

**Fig. S12** HRMS spectrum of (tfmpqz)<sub>2</sub>Ir(cf<sub>3</sub>dtc) complex.

**Table S1.** Crystal information of (tfmpqz)<sub>2</sub>Ir(dpdtc), (tfmpqz)<sub>2</sub>Ir(medtc) and (tfmpqz)<sub>2</sub>Ir(cf<sub>3</sub>dtc) complexes.

|                | (tfmpqz) <sub>2</sub> Ir(dpdtc)                                                | (tfmpqz) <sub>2</sub> Ir(medtc)                                                | (tfmpqz) <sub>2</sub> Ir(cf <sub>3</sub> dtc)                                   |
|----------------|--------------------------------------------------------------------------------|--------------------------------------------------------------------------------|---------------------------------------------------------------------------------|
| Formula        | C <sub>43</sub> H <sub>26</sub> F <sub>6</sub> IrN <sub>5</sub> S <sub>2</sub> | C <sub>45</sub> H <sub>30</sub> F <sub>6</sub> IrN <sub>5</sub> S <sub>2</sub> | C <sub>45</sub> H <sub>24</sub> F <sub>12</sub> IrN <sub>5</sub> S <sub>2</sub> |
| Formula weight | 983.01                                                                         | 1011.06                                                                        | 1119.01                                                                         |
| T (K)          | 173 (2)                                                                        | 173 (2)                                                                        | 296 (2)                                                                         |
| Wavelength (Å) | 0.71073                                                                        | 0.71073                                                                        | 0.71073                                                                         |
| Crystal system | Monoclinic                                                                     | Monoclinic                                                                     | Monoclinic                                                                      |
| Space group    | <i>P</i> 2 <sub>1</sub> / <i>n</i>                                             | <i>C</i> 2/ <i>c</i>                                                           | <i>P</i> 2 <sub>1</sub> / <i>c</i>                                              |
| <i>a</i> (Å)   | 12.3627 (6)                                                                    | 10.442 (11)                                                                    | 10.4204 (6)                                                                     |
| <i>b</i> (Å)   | 16.1241 (7)                                                                    | 23.68 (3)                                                                      | 26.2335 (16)                                                                    |



|                                            |                |                |                |
|--------------------------------------------|----------------|----------------|----------------|
| $c$ (Å)                                    | 19.8219 (8)    | 15.834 (16)    | 16.5370 (10)   |
| $\alpha$ (deg)                             | 90.00          | 90.00          | 90.00          |
| $\beta$ (deg)                              | 103.0820 (10)  | 106.52 (2)     | 107.1480 (10)  |
| $\gamma$ (deg)                             | 90.00          | 90.00          | 90.00          |
| $V$ (Å <sup>3</sup> )                      | 3848.7 (3)     | 3754 (7)       | 4319.7 (4)     |
| $Z$                                        | 4              | 4              | 4              |
| $\rho_{\text{calcd}}$ (g/cm <sup>3</sup> ) | 1.696          | 1.789          | 1.721          |
| $\mu$ (Mo K $\alpha$ ) (mm <sup>-1</sup> ) | 3.646          | 3.741          | 3.279          |
| $F$ (000)                                  | 1928           | 1992           | 2184           |
| Range of transm factors                    | 2.111 - 25.009 | 2.264 - 25.010 | 1.054 - 25.009 |
| Reflns collected                           | 27640          | 4585           | 24278          |
| Unique( $R_{\text{int}}$ )                 | 6786 (0.0428)  | 3294 (0.0350)  | 7619 (0.0453)  |
| $R_f^a$ , $wR_2^b$ [ $I > 2s(I)$ ]         | 0.0255, 0.0517 | 0.0570, 0.1400 | 0.0406, 0.0816 |
| $R_f^a$ , $wR_2^b$ (all data)              | 0.0389, 0.0557 | 0.0693, 0.1497 | 0.0655, 0.0903 |
| GOF on $F^2$                               | 1.043          | 1.107          | 1.042          |
| CCDC No.                                   | 1891565        | 1885951        | 1885886        |

$$R_1^a = \frac{\sum ||F_o| - |F_c||}{\sum F_o}, \quad wR_2^b = [\sum w(F_o^2 - F_c^2)^2 / \sum w(F_o^2)]^{1/2}$$

**Table S2.** Selected bond lengths and angles of (tfmpqz)<sub>2</sub>Ir(dpdtc), (tfmpqz)<sub>2</sub>Ir(medtc) and (tfmpqz)<sub>2</sub>Ir(cf3dtc) complexes.

| (tfmpqz) <sub>2</sub> Ir(dpdtc) |            | (tfmpqz) <sub>2</sub> Ir(medtc) |            | (tfmpqz) <sub>2</sub> Ir(cf3dtc) |             |
|---------------------------------|------------|---------------------------------|------------|----------------------------------|-------------|
| Selected bonds                  |            |                                 |            |                                  |             |
| C20-Ir1                         | 2.002 (4)  | C1-Ir1                          | 1.955 (8)  | Ir1-C45                          | 2.003 (6)   |
| C43-Ir1                         | 2.005 (3)  | N1-Ir1                          | 2.005 (7)  | Ir1-C44                          | 2.016 (5)   |
| Ir1-N2                          | 2.033 (3)  | N1 <sup>i</sup> -Ir1            | 2.004 (7)  | Ir1-N2                           | 2.031 (5)   |
| Ir1-N3                          | 2.032 (3)  | Ir1-S1                          | 2.412 (3)  | Ir1-N5                           | 2.057 (4)   |
| Ir1-S1                          | 2.468 (8)  | Ir1-S1 <sup>i</sup>             | 2.412 (3)  | Ir1-S1                           | 2.4503 (16) |
| Ir1-S2                          | 2.470 (9)  | S1-C16                          | 1.669 (7)  | Ir1-S2                           | 2.4801 (18) |
| C36-S1                          | 1.703 (4)  | S1 <sup>i</sup> -C16            | 1.669 (7)  | C28-N7                           | 1.359 (8)   |
| C36-S2                          | 1.719 (3)  | C16-N3                          | 1.312 (16) | C28-S1                           | 1.705 (6)   |
| C36-N5                          | 1.342 (4)  | C1-Ir1-N1                       | 77.5 (3)   | C28-S2                           | 1.701 (6)   |
| Selected angles                 |            |                                 |            |                                  |             |
| C20-Ir1-N3                      | 78.95 (14) | S1-Ir1-S1 <sup>i</sup>          | 71.14 (13) | C44-Ir1-N2                       | 78.7 (2)    |
| C43-Ir1-N2                      | 78.30 (12) | S1-C16-S1 <sup>i</sup>          | 114.4 (7)  | C45-Ir1-N5                       | 79.3 (2)    |

S1-Ir1-S2      71.50 (3)      C1-Ir1-C1<sup>1</sup>      94.5 (5)      S1-Ir1-S2      71.60 (6)

---

**Table S3.** HOMO and LUMO electron cloud density distributions of each fragment of three Ir(III) complexes.

| Complex                          | Orbit | Composition(%) |         |                  |
|----------------------------------|-------|----------------|---------|------------------|
|                                  |       | tfmpqz         | Ir atom | ancillary ligand |
| (tfmpqz) <sub>2</sub> Ir(dpdc)   | HOMO  | 43.55          | 47.66   | 8.79             |
|                                  | LUMO  | 93.51          | 4.08    | 2.41             |
| (tfmpqz) <sub>2</sub> Ir(medtc)  | HOMO  | 41.80          | 48.78   | 9.43             |
|                                  | LUMO  | 94.29          | 3.53    | 2.17             |
| (tfmpqz) <sub>2</sub> Ir(cf3dte) | HOMO  | 40.77          | 48.54   | 10.69            |
|                                  | LUMO  | 91.33          | 3.60    | 5.06             |
